# Supplementary material for: Neutralization of SARS-CoV-2 Variants by rVSV-ΔG-Spike-Elicited Human Sera
Source: MDPI journal article supplement (doi:10.3390/vaccines10020291), 2022-02-14
Supplement: s1 [file s1]

## SUPPLEMENTARY MATERIAL

**Table S1.** Neutralizing titers (NT<sub>50</sub>) of BriLife® vaccinees against SARS-CoV-2 original virus, variants alpha, beta, and gamma (set 1). Samples that were below

| <b>Vaccinee #</b>                              | <b>original virus</b> | <b>alpha</b> | <b>beta</b> | <b>gamma</b> |
|------------------------------------------------|-----------------------|--------------|-------------|--------------|
| 1                                              | 241                   | 72           | 10          | 321          |
| 2                                              | 65                    | 10           | 44          | 114          |
| 3                                              | 137                   | 54           | 10          | 160          |
| 4                                              | 197                   | 154          | 75          | 228          |
| 5                                              | 251                   | 108          | 34          | 504          |
| 6                                              | 220                   | 49           | 41          | 426          |
| 7                                              | 240                   | 86           | 234         | 349          |
| 8                                              | 258                   | 95           | 60          | 220          |
| 9                                              | 608                   | 836          | 420         | 896          |
| <b>Mean titer</b>                              | <b>246</b>            | <b>163</b>   | <b>103</b>  | <b>357</b>   |
| Fold change<br>(relative to<br>original virus) |                       | 1.5          | 2.4         | 0.7          |

LOD were assigned a value of 10 (half of the LOD).

**Table S2.** Neutralization titers (NT<sub>50</sub>) of BriLife® vaccinees against SARS-CoV-2 original virus, delta and omicron variant of concern (set 2). Samples that were below LOD were assigned a value of 10 (half of the LOD).

| <b>Vaccinee #</b>                                | <b>original virus</b> | <b>delta</b> | <b>omicron</b> |
|--------------------------------------------------|-----------------------|--------------|----------------|
| 1                                                | 121                   | 85           | 85             |
| 2                                                | 130                   | 66           | 48             |
| 3                                                | 42                    | 149          | 55             |
| 4                                                | 166                   | 85           | 47             |
| 5                                                | 208                   | 210          | 175            |
| 6                                                | 112                   | 80           | 68             |
| 7                                                | 133                   | 104          | 75             |
| 8                                                | 83                    | 10           | 38             |
| 9                                                | 375                   | 383          | 25             |
| 10                                               | 94                    | 10           | 43             |
| 11                                               | 141                   | 172          | 10             |
| 12                                               | 295                   | 273          | 10             |
| 13                                               | 80                    | 78           | 10             |
| <b>Mean titers</b>                               | <b>152</b>            | <b>131</b>   | <b>53</b>      |
| Fold decrease<br>(relative to original<br>virus) |                       | 1.2          | 2.9            |

**Table S3.** Neutralization titers (NT<sub>50</sub>) of BriLife® vaccinees against rVSV-WT (Indiana serotype) at time zero (T0), 28 days post 1<sup>st</sup> vaccination (P) and two weeks following 2<sup>nd</sup> vaccination (P+B). Samples that were below LOD were assigned a value of 10 (half of the LOD).

| <b>Vaccinee #</b>  | <b>T0</b> | <b>P</b>  | <b>P+B</b> |
|--------------------|-----------|-----------|------------|
| 1                  | 21        | 38        | 62         |
| 2                  | 83        | 99        | 202        |
| 3                  | 10        | 10        | 72         |
| 4                  | 10        | 10        | 10         |
| 5                  | 115       | 57        | 52         |
| 6                  | 10        | 45        | 10         |
| 7                  | 10        | 10        | 10         |
| 8                  | 43        | 30        | 45         |
| 9                  | 10        | 10        | 59         |
| 10                 | 10        | 10        | 10         |
| <b>Mean titers</b> | <b>32</b> | <b>32</b> | <b>53</b>  |

**Table S4.** Neutralizing titers (NT<sub>50</sub>) of convalescent sera against SARS-CoV-2 original virus, variants alpha, beta, gamma and delta (convalescent set). Samples that were below LOD were assigned a value of half of the LOD.

| <b>Convalescent<br/>sera #</b>                      | <b>original<br/>virus</b> | <b>alpha</b> | <b>beta</b> | <b>gamma</b> | <b>delta</b> |
|-----------------------------------------------------|---------------------------|--------------|-------------|--------------|--------------|
| 1                                                   | 541                       | 296          | 279         | 423          | 85           |
| 2                                                   | 1385                      | 1027         | 760         | 953          | 212          |
| 3                                                   | 758                       | 197          | 139         | 333          | 160          |
| 4                                                   | 142                       | 177          | 160         | 95           | 79           |
| 5                                                   | 366                       | 100          | 107         | 297          | 178          |
| 6                                                   | 323                       | 40           | 79          | 269          | 115          |
| 7                                                   | 119                       | 41           | 65          | 132          | 39           |
| 8                                                   | 104                       | 20           | 66          | 40           | 103          |
| 9                                                   | 123                       | 51           | 39          | 50           | 41           |
| <b>Mean titers</b>                                  | <b>429</b>                | <b>216</b>   | <b>188</b>  | <b>288</b>   | <b>113</b>   |
| Fold decrease<br>(relative to<br>original<br>virus) |                           | 2.0          | 2.3         | 1.5          | 3.8          |

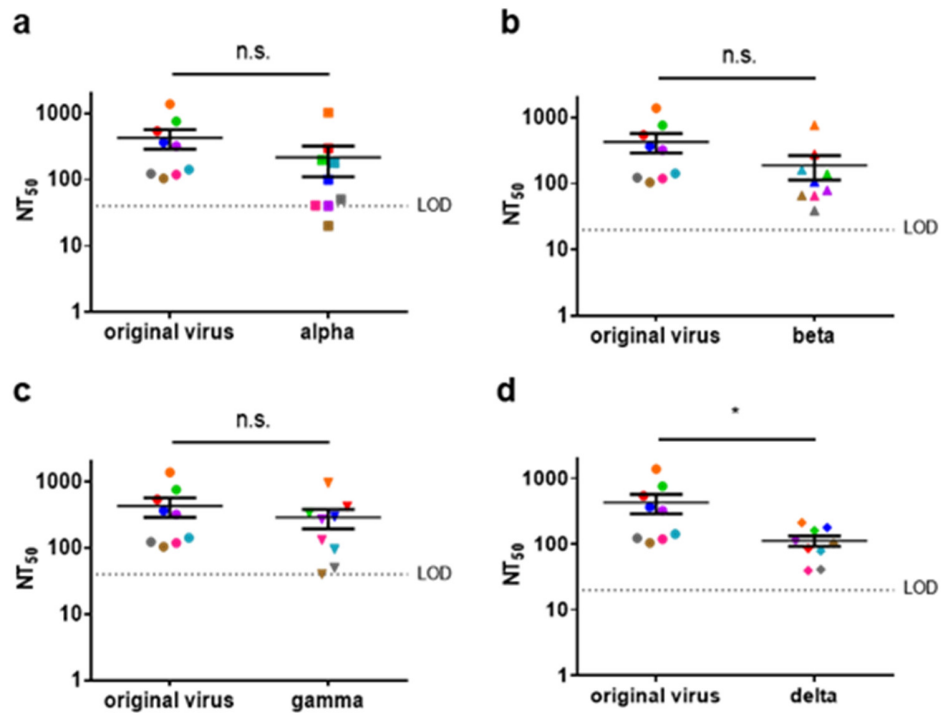

**Figure S1: Neutralization of alpha, beta, gamma and delta variants by sera from convalescent patients:** (a) NT<sub>50</sub> of convalescent patients' sera against SARS-CoV-2 original virus, in comparison to (a) alpha, (b) beta, (c) gamma and (d) delta (n=9) variants. Each serum is color coded for all tested viruses. LOD is indicated in each panel (a,c LOD=40; b,d LOD=20). Samples below LOD were assigned a value of half the LOD. Data is presented as mean  $\pm$  SEM. Significance was determined by unpaired t-test. p values: 0.2454, 0.1514, 0.4184, 0.0409, for comparison of original virus to alpha, beta, gamma and delta, respectively.
